# Supplementary material for: A Comprehensive Comparison of Bovine and Porcine Decellularized Pericardia: New Insights for Surgical Applications
Source: MDPI journal article supplement (doi:10.3390/biom10030371), 2020-02-28
Supplement: s1 [file s1]

## Supplementary Material

# A Comprehensive Comparison of Bovine and Porcine Decellularized Pericardia: New Insights for Surgical Applications

Sabra Zouhair <sup>1,†</sup>, Eleonora Dal Sasso <sup>1,†</sup>, Sugat R. Tuladhar <sup>1,†</sup>, Catia Fidalgo <sup>1</sup>, Luca Vedovelli <sup>2</sup>, Andrea Filippi <sup>3,4,5</sup>, Giulia Borile <sup>3,5,6</sup>, Andrea Bagno <sup>7,8</sup>, Massimo Marchesan <sup>1</sup>, De Rossi Giorgio <sup>9</sup>, Dario Gregori <sup>2</sup>, Willem F. Wolkers <sup>10</sup>, Filippo Romanato <sup>3,5,8,11</sup>, Sotirios Korossis <sup>12,13,14</sup>, Gino Gerosa <sup>1,8,§</sup>, and Laura Iop <sup>1,8,§,\*</sup>

<sup>1</sup> Cardiovascular Regenerative Medicine, Department of Cardiac Thoracic Vascular Sciences and Public Health, University of Padua, I-35128 Padua, Italy

<sup>2</sup> Biostatistics, Department of Cardiac Thoracic Vascular Sciences and Public Health, University of Padua, I-35128 Padua, Italy

<sup>3</sup> Department of Physics and Astronomy "G. Galilei," University of Padua, I-35131 Padua, Italy

<sup>4</sup> Fondazione Bruno Kessler, I-38123 Trento, Italy,

<sup>5</sup> Institute of Pediatric Research Città della Speranza, I-35127 Padua, Italy

<sup>6</sup> Department of Biomedical Sciences, University of Padua, I-35131 Padua, Italy

<sup>7</sup> Department of Industrial Engineering, University of Padua, I-35131 Padua, Italy

<sup>8</sup> L.I.F.E.L.A.B. Program, Consorzio per la Ricerca Sanitaria (CORIS), Veneto Region, I-35127 Padua, Italy

<sup>9</sup> ULSS 3 Serenissima, Mestre, I-30174 Venice, Italy

<sup>10</sup> Institute of Multiphase Processes, Leibniz Universität Hannover, D-30167 Hannover, Germany

<sup>11</sup> Laboratory for Nanofabrication of Nanodevices, I-35127 Padua, Italy

<sup>12</sup> Department of Cardiothoracic, Transplantation and Vascular Surgery, Hannover Medical School, D-30625 Hannover, Germany

<sup>13</sup> Lower Saxony Centre for Biomedical Engineering Implant Research and Development, Hannover Medical School, D-30625 Hannover, Germany

<sup>14</sup> Centre for Biological Engineering, Wolfson School of Mechanical, Electrical and Manufacturing Engineering, Loughborough University, LE11 3TU Loughborough, Leicestershire, United Kingdom.

<sup>†</sup> These authors contributed equally.

<sup>§</sup> These authors contributed equally.

\* Correspondence: [laura.iop@unipd.it](mailto:laura.iop@unipd.it); Tel.: +39-049-821-7651

Received: 23 January 2020; Accepted: 17 February 2020; Published: date

**Table 1** Quantification of ECM Components, Water and DNA Contents in Native and Decellularized Pericardia

|                                                   | <i>NBPs</i>       | <i>DBPs</i>       | <i>p</i> | <i>NPPs</i>        | <i>DPPs</i>        | <i>p</i> |
|---------------------------------------------------|-------------------|-------------------|----------|--------------------|--------------------|----------|
| <i>HYP</i> ( $\mu\text{g mg}^{-1}$ )              | 106.60 $\pm$ 3.11 | 113.26 $\pm$ 1.96 | 0.0063   | 114.48 $\pm$ 11.18 | 121.30 $\pm$ 11.38 | 0.3667   |
| <i>Denatured HYP</i><br>( $\mu\text{g mg}^{-1}$ ) | 12.06 $\pm$ 6.74  | 16.66 $\pm$ 8.18  | 0.9949   | 5.85 $\pm$ 1.50    | 4.93 $\pm$ 1.14    | 0.5435   |
| <i>sGAGs</i> ( $\mu\text{g mg}^{-1}$ )            | 12.59 $\pm$ 4.10  | 5.75 $\pm$ 1.01   | 0.0085   | 8.15 $\pm$ 2.49    | 6.15 $\pm$ 1.01    | 0.1145   |
| <i>Elastin</i> ( $\mu\text{g mg}^{-1}$ )          | 44.95 $\pm$ 11.12 | 48.88 $\pm$ 18.36 | 0.6634   | 49.55 $\pm$ 6.58   | 46.42 $\pm$ 11.78  | 0.5828   |
| <i>Water</i> (%)                                  | 81.01 $\pm$ 0.87  | 83.00 $\pm$ 00.00 | < 0.0001 | 78.36 $\pm$ 2.67   | 75.26 $\pm$ 0.95   | 0.0031   |
| <i>DNA</i> ( $\mu\text{g mg}^{-1}$ )              | 1446 $\pm$ 699.8  | 66.05 $\pm$ 72.79 | 0.0046   | 1774 $\pm$ 385.8   | 56.47 $\pm$ 40.11  | 0.0001   |

Legend: NBP: native bovine pericardium; DBP: decellularized bovine pericardium; NPP: native porcine pericardium; DPP: decellularized porcine pericardium; HYP: hydroxyproline; sGAGs: sulfated glycosaminoglycans.
